# Supplementary material for: Preoperative Assessment of Perianal Fistulas With Combined Magnetic Resonance and Tridimensional Endoanal Ultrasound: A Prospective Study
Source: Preprints.org preprint supplement (doi:10.20944/preprints202306.0949.v1), 2023-06-13
Supplement: Supplementary file 3 [file supplementary]

**Table S1.** Pelvic MRI Protocols for Perianal Fistula Evaluation.

| **Sequences and Slice Orientation** | **No. of Signal**  **Averages** | **FOV (mm)** | **Imaging Plane**  **Direction** | **Acquired Matrix**  **(Frequency × Phase)** | **Slice Thickness**  **(mm)** | **TR/TE** |
| --- | --- | --- | --- | --- | --- | --- |
| **Coronal single-shot turbo spin-echo (fast**  **spin-echo) (localizer)** | **2** | **340 × 380** | **Right-left ×**  **Head-foot** | **316 × 247** | **5 mm 1.6gap** | **3000–5000/180** |
| **Axial high-resolution T2-weighted turbo**  **spin-echo (fast spin-echo)** | **2** | **360 × 340** | **Right-left ×**  **anterior-posterior** | **800 × 759** | **4 mm 1gap** | **3000–5000/80** |
| **Sagittal T2-weighted turbo spin-echo (fast**  **spin-echo) with fat suppression** | **3** | **200 × 200** | **Head-foot ×**  **anterior-posterior** | **400 × 233** | **6 mm 1.7gap** | **3000–5000/80** |
| **Axial T2-weighted turbo spin-echo (fast**  **spin-echo) with fat suppression** | **4** | **200 × 160** | **Right-left ×**  **anterior-posterior** | **256 × 133** | **4 mm1 gap** | **3000–5000/80** |
| **Axial STIR (optional)** | **1** | **200 × 160** | **Right-left ×**  **anterior-posterior** | **256 × 149** | **4 mm1 gap** | **2500–6000/30** |
| **Sagittal STIR** | **3** | **200 × 200** | **Head-foot ×**  **anterior-posterior** | **400 × 233** | **6 mm 1.7gap** | **3000–5000/80** |
| **Axial T1-weighted turbo spin-echo (fast**  **spin-echo)** | **2** | **200 × 160** | **Right-left ×**  **anterior-posterior** | **400 × 226** | **4 mm 1gap** | **500–800/11** |
| **Axial T1-weighted 3D gradient-recalled**  **echo with fat suppression with and**  **without IV contrast agent** | **4** | **200 × 160** | **Right-left ×**  **anterior-posterior** | **224 × 178** | **1.8** | **3.6/1.8** |
| **Sagittal 3D gradient-recalled echo with fat**  **suppression** | **4** | **200 × 160** | **Foot-head ×**  **anterior-posterior** | **224 × 178** | **1.8** | **3.6/1.8** |
